# Supplementary material for: New Cancer Diagnoses Before and During the COVID-19 Pandemic
Source: PubMed Central journal article supplement (PMC10481240; doi:10.1001/jamanetworkopen.2023.32363), 2023-09-05
Supplement: jamanetwopen-e2332363-s001.pdf [file jamanetwopen-e2332363-s001.pdf]

## Supplemental Online Content

Decker KM, Feely A, Bucher O, et al. New cancer diagnoses before and during the COVID-19 pandemic. *JAMA Netw Open*. 2023;6(9):e2332363. doi:10.1001/jamanetworkopen.2023.32363

**eTable 1.** Description of cancer cases diagnosed in Manitoba, Canada from January 2015 to December 2021

**eTable 2.** Ratios and 95% confidence intervals between fitted and counterfactual incidence values for cancer sites with no significant COVID-19-by-time interaction from April 2020 to December 2021

**eTable 3.** Ratios and 95% confidence intervals between fitted and counterfactual incidence values for cancer sites with a significant COVID-19-by-time interaction by month from April 2020 to December 2021

**eTable 4.** Ratios and 95% confidence intervals between fitted and counterfactual incidence values for breast, colon, rectal, and lung cancer by age group and month from April 2020 to December 2021

**eTable 5.** Estimated cumulative fitted and counterfactual number of cancer cases, difference, and percent difference by site as of December 31, 2021

**eFigure 1.** Incidence rate for breast cancer for women <50, 50 to 74, and  $\geq 75$  years of age by month, Manitoba

**eFigure 2.** Incidence rate for lung cancer for individuals <50 years, 50 to 74, and  $\geq 75$  years of age by month, Manitoba

**eFigure 3.** Incidence rate for colon cancer for individuals <50, 50 to 74, and  $\geq 75$  years of age by month, Manitoba

**eFigure 4.** Incidence rate for rectal cancer for individuals <50 years of age, 50 to 74, and  $\geq 75$  years of age by month, Manitob

**eAppendix 1.** Cancer types included in each category and International Classification of Diseases for Oncology version 3 (ICD-O-3) codes

**eAppendix 2.** R code and simulated data for an interrupted time series analysis

This supplemental material has been provided by the authors to give readers additional information about their work.

**eTable 1. Description of cancer cases diagnosed in Manitoba, Canada from January 2015 to December 2021**

| Cancer site                             | Number of cases | Median age at diagnosis | Sex, n (%)    |               |
|-----------------------------------------|-----------------|-------------------------|---------------|---------------|
|                                         |                 |                         | Male          | Female        |
| <b>All</b>                              | 48,378          | 68                      | 24,404 (50.4) | 23,972 (49.6) |
| <b>Breast</b>                           | 6,548           | 65                      | 0 (0.0)       | 6,548 (100.0) |
| <b>Lung</b>                             | 6,477           | 72                      | 3,102 (47.9)  | 3,375 (52.1)  |
| <b>Prostate</b>                         | 5,849           | 69                      | 5,849 (100.0) | 0 (0.0)       |
| <b>Colon</b>                            | 3,876           | 71                      | 1,985 (51.2)  | 1,891 (48.8)  |
| <b>Rectal</b>                           | 2,012           | 66                      | 1,273 (63.3)  | 739 (36.7)    |
| <b>Hematologic</b>                      | 4,655           | 68                      | 2,678 (57.5)  | 1,977 (42.5)  |
| <b>Unknown primary</b>                  | 1,764           | 74                      | 941 (53.3)    | 823 (46.7)    |
| <b>Head and neck</b>                    | 1,674           | 66                      | 1,203 (71.9)  | 471 (28.1)    |
| <b>Endocrine</b>                        | 1,130           | 52                      | 325 (28.8)    | 805 (71.2)    |
| <b>Melanoma</b>                         | 1,952           | 67                      | 1,095 (56.1)  | 857 (43.9)    |
| <b>Brain and central nervous system</b> | 662             | 61                      | 384 (58.0)    | 278 (42.0)    |
| <b>Urinary</b>                          | 2,982           | 69                      | 2,120 (71.1)  | 862 (28.9)    |
| <b>Gynecologic</b>                      | 3,228           | 63                      | 0 (0.0)       | 3,228 (100.0) |
| <b>Other digestive</b>                  | 3,164           | 69                      | 1,966 (62.1)  | 1,198 (37.9)  |
| <b>Pancreatic</b>                       | 1,352           | 72                      | 683 (50.5)    | 669 (49.5)    |
| <b>Other</b>                            | 1,053           | 58                      | 800 (76.0)    | 251 (23.8)    |

**eTable 2. Ratios and 95% confidence intervals between fitted and counterfactual incidence values for cancer sites with no significant COVID-19-by-time interaction from April 2020 to December 2021**

| <b>Time frame</b>           | <b>Prostate</b>   | <b>Gynecological</b> | <b>Other digestive</b> | <b>Pancreas</b>   | <b>Brain and central nervous system</b> | <b>Other</b>      | <b>Urinary</b>    |
|-----------------------------|-------------------|----------------------|------------------------|-------------------|-----------------------------------------|-------------------|-------------------|
| <b>Apr 2020 to Dec 2021</b> | 0.94 (0.83, 1.07) | 1.01 (0.90, 1.13)    | 0.99 (0.88, 1.11)      | 1.07 (0.89, 1.29) | 0.74 (0.58, 0.96)                       | 1.10 (0.90, 1.35) | 0.88 (0.78, 1.00) |

**eTable 3. Ratios and 95% confidence intervals between fitted and counterfactual incidence values for cancer sites with a significant COVID-19-by-time interaction by month from April 2020 to December 2021**

| Cancer Site | All               | Breast            | Lung              | Colon             | Rectal            | Hematologic       | Unknown primary   | Head and neck     | Endocrine         | Melanoma          |
|-------------|-------------------|-------------------|-------------------|-------------------|-------------------|-------------------|-------------------|-------------------|-------------------|-------------------|
| <b>2020</b> |                   |                   |                   |                   |                   |                   |                   |                   |                   |                   |
| <b>Apr</b>  | 0.77 (0.70, 0.84) | 0.54 (0.42, 0.68) | 0.98 (0.88, 1.08) | 0.65 (0.54, 0.78) | 0.53 (0.33, 0.84) | 1.12 (1.00, 1.26) | 1.08 (0.87, 1.35) | 0.50 (0.34, 0.74) | 0.77 (0.56, 1.05) | 0.35 (0.18, 0.66) |
| <b>May</b>  | 0.77 (0.70, 0.84) | 0.54 (0.42, 0.68) | 0.98 (0.88, 1.08) | 0.65 (0.54, 0.78) | 1.05 (0.79, 1.38) | 1.12 (1.00, 1.26) | 1.08 (0.87, 1.35) | 0.50 (0.34, 0.74) | 0.79 (0.58, 1.06) | 0.91 (0.77, 1.08) |
| <b>Jun</b>  | 0.97 (0.93, 1.01) | 0.89 (0.80, 0.99) | 0.98 (0.88, 1.08) | 0.65 (0.54, 0.78) | 1.05 (0.79, 1.38) | 1.12 (1.00, 1.26) | 1.08 (0.87, 1.35) | 1.00 (0.85, 1.16) | 0.81 (0.61, 1.08) | 0.91 (0.77, 1.08) |
| <b>Jul</b>  | 0.97 (0.93, 1.01) | 0.89 (0.80, 0.99) | 0.98 (0.88, 1.08) | 0.65 (0.54, 0.78) | 1.05 (0.79, 1.38) | 1.12 (1.00, 1.26) | 1.08 (0.87, 1.35) | 1.00 (0.85, 1.16) | 0.83 (0.63, 1.09) | 0.91 (0.77, 1.08) |
| <b>Aug</b>  | 0.97 (0.93, 1.01) | 0.89 (0.80, 0.99) | 0.98 (0.88, 1.08) | 0.93 (0.83, 1.04) | 1.05 (0.79, 1.38) | 1.12 (1.00, 1.26) | 1.08 (0.87, 1.35) | 1.00 (0.85, 1.16) | 0.85 (0.65, 1.11) | 0.91 (0.77, 1.08) |
| <b>Sep</b>  | 0.97 (0.93, 1.01) | 0.89 (0.80, 0.99) | 0.98 (0.88, 1.08) | 0.93 (0.83, 1.04) | 1.05 (0.79, 1.38) | 1.12 (1.00, 1.26) | 1.08 (0.87, 1.35) | 1.00 (0.85, 1.16) | 0.87 (0.67, 1.12) | 0.91 (0.77, 1.08) |
| <b>Oct</b>  | 0.97 (0.93, 1.01) | 0.89 (0.80, 0.99) | 0.98 (0.88, 1.08) | 0.93 (0.83, 1.04) | 1.05 (0.79, 1.38) | 1.12 (1.00, 1.26) | 1.08 (0.87, 1.35) | 1.00 (0.85, 1.16) | 0.89 (0.70, 1.15) | 0.91 (0.77, 1.08) |
| <b>Nov</b>  | 0.97 (0.93, 1.01) | 0.89 (0.80, 0.99) | 0.98 (0.88, 1.08) | 0.93 (0.83, 1.04) | 1.05 (0.79, 1.38) | 1.12 (1.00, 1.26) | 1.08 (0.87, 1.35) | 1.00 (0.85, 1.16) | 0.91 (0.72, 1.17) | 0.91 (0.77, 1.08) |
| <b>Dec</b>  | 0.97 (0.93, 1.01) | 0.89 (0.80, 0.99) | 0.89 (0.81, 0.99) | 0.93 (0.83, 1.04) | 1.05 (0.79, 1.38) | 1.12 (1.00, 1.26) | 1.08 (0.87, 1.35) | 1.00 (0.85, 1.16) | 0.94 (0.74, 1.19) | 0.91 (0.77, 1.08) |
| <b>2021</b> |                   |                   |                   |                   |                   |                   |                   |                   |                   |                   |
| <b>Jan</b>  | 0.97 (0.93, 1.01) | 0.89 (0.80, 0.99) | 0.89 (0.81, 0.99) | 0.93 (0.83, 1.04) | 1.05 (0.79, 1.38) | 0.96 (0.85, 1.09) | 0.82 (0.65, 1.03) | 1.00 (0.85, 1.16) | 0.96 (0.76, 1.22) | 0.91 (0.77, 1.08) |
| <b>Feb</b>  | 0.97 (0.93, 1.01) | 0.89 (0.80, 0.99) | 0.89 (0.81, 0.99) | 0.93 (0.83, 1.04) | 1.05 (0.79, 1.38) | 0.96 (0.85, 1.09) | 0.82 (0.65, 1.03) | 1.00 (0.85, 1.16) | 0.99 (0.77, 1.25) | 0.91 (0.77, 1.08) |
| <b>Mar</b>  | 0.97 (0.93, 1.01) | 0.89 (0.80, 0.99) | 0.89 (0.81, 0.99) | 0.93 (0.83, 1.04) | 1.05 (0.79, 1.38) | 0.96 (0.85, 1.09) | 0.82 (0.65, 1.03) | 1.00 (0.85, 1.16) | 1.01 (0.79, 1.29) | 0.91 (0.77, 1.08) |
| <b>Apr</b>  | 0.97 (0.93, 1.01) | 0.89 (0.80, 0.99) | 0.89 (0.81, 0.99) | 0.93 (0.83, 1.04) | 1.05 (0.79, 1.38) | 0.96 (0.85, 1.09) | 0.82 (0.65, 1.03) | 1.00 (0.85, 1.16) | 1.04 (0.81, 1.33) | 0.91 (0.77, 1.08) |
| <b>May</b>  | 0.97 (0.93, 1.01) | 0.89 (0.80, 0.99) | 0.89 (0.81, 0.99) | 0.93 (0.83, 1.04) | 1.05 (0.79, 1.38) | 0.96 (0.85, 1.09) | 0.82 (0.65, 1.03) | 1.00 (0.85, 1.16) | 1.06 (0.82, 1.37) | 0.91 (0.77, 1.08) |

|            |                   |                   |                   |                   |                   |                   |                   |                   |                   |                   |
|------------|-------------------|-------------------|-------------------|-------------------|-------------------|-------------------|-------------------|-------------------|-------------------|-------------------|
| <b>Jun</b> | 0.97 (0.93, 1.01) | 0.89 (0.80, 0.99) | 0.89 (0.81, 0.99) | 0.93 (0.83, 1.04) | 1.05 (0.79, 1.38) | 0.96 (0.85, 1.09) | 0.82 (0.65, 1.03) | 1.00 (0.85, 1.16) | 1.09 (0.84, 1.42) | 0.91 (0.77, 1.08) |
| <b>Jul</b> | 0.97 (0.93, 1.01) | 0.89 (0.80, 0.99) | 0.89 (0.81, 0.99) | 0.93 (0.83, 1.04) | 1.05 (0.79, 1.38) | 0.96 (0.85, 1.09) | 0.82 (0.65, 1.03) | 1.00 (0.85, 1.16) | 1.12 (0.85, 1.47) | 0.91 (0.77, 1.08) |
| <b>Aug</b> | 0.97 (0.93, 1.01) | 0.89 (0.80, 0.99) | 0.89 (0.81, 0.99) | 0.93 (0.83, 1.04) | 1.05 (0.79, 1.38) | 0.96 (0.85, 1.09) | 0.82 (0.65, 1.03) | 1.00 (0.85, 1.16) | 1.15 (0.86, 1.52) | 0.91 (0.77, 1.08) |
| <b>Sep</b> | 0.97 (0.93, 1.01) | 0.89 (0.80, 0.99) | 0.89 (0.81, 0.99) | 0.93 (0.83, 1.04) | 1.05 (0.79, 1.38) | 0.96 (0.85, 1.09) | 0.82 (0.65, 1.03) | 1.00 (0.85, 1.16) | 1.17 (0.87, 1.58) | 0.91 (0.77, 1.08) |
| <b>Oct</b> | 0.97 (0.93, 1.01) | 0.89 (0.80, 0.99) | 0.89 (0.81, 0.99) | 0.93 (0.83, 1.04) | 1.05 (0.79, 1.38) | 0.96 (0.85, 1.09) | 0.82 (0.65, 1.03) | 1.00 (0.85, 1.16) | 1.20 (0.88, 1.64) | 0.91 (0.77, 1.08) |
| <b>Nov</b> | 0.97 (0.93, 1.01) | 0.89 (0.80, 0.99) | 0.89 (0.81, 0.99) | 0.93 (0.83, 1.04) | 1.05 (0.79, 1.38) | 0.96 (0.85, 1.09) | 0.82 (0.65, 1.03) | 1.00 (0.85, 1.16) | 1.23 (0.89, 1.71) | 0.91 (0.77, 1.08) |
| <b>Dec</b> | 0.97 (0.93, 1.01) | 0.89 (0.80, 0.99) | 0.89 (0.81, 0.99) | 0.93 (0.83, 1.04) | 1.05 (0.79, 1.38) | 0.96 (0.85, 1.09) | 0.82 (0.65, 1.03) | 1.00 (0.85, 1.16) | 1.27 (0.90, 1.78) | 0.91 (0.77, 1.08) |

**eTable 4. Ratios and 95% confidence intervals between fitted and counterfactual incidence values for breast, colon, rectal, and lung cancer by age group and month from April 2020 to December 2021**

| Cancer Site | Breast               |                      |                      | Colon                |                      |                      | Rectal               |                      |                      | Lung                 |                      |                      |
|-------------|----------------------|----------------------|----------------------|----------------------|----------------------|----------------------|----------------------|----------------------|----------------------|----------------------|----------------------|----------------------|
|             | <50                  | 50-74                | 75+                  | <50                  | 50-74                | 75+                  | <50                  | 50-74                | 75+                  | <50                  | 50-74                | 75+                  |
| <b>2020</b> |                      |                      |                      |                      |                      |                      |                      |                      |                      |                      |                      |                      |
| <b>Apr</b>  | 1.03<br>(0.81, 1.31) | 0.54<br>(0.36, 0.80) | 0.80<br>(0.65, 0.97) | 0.91<br>(0.57, 1.45) | 0.66<br>(0.52, 0.83) | 0.66<br>(0.51, 0.85) | 1.21<br>(0.81, 1.80) | 0.55<br>(0.32, 0.92) | 1.21<br>(0.86, 1.72) | 1.21<br>(0.65, 2.24) | 1.02<br>(0.91, 1.14) | 0.54<br>(0.40, 0.73) |
| <b>May</b>  | 1.03<br>(0.81, 1.31) | 0.27<br>(0.16, 0.46) | 0.80<br>(0.65, 0.97) | 0.91<br>(0.57, 1.45) | 0.66<br>(0.52, 0.83) | 0.66<br>(0.51, 0.85) | 1.21<br>(0.81, 1.80) | 1.16<br>(0.95, 1.42) | 1.21<br>(0.86, 1.72) | 1.21<br>(0.65, 2.24) | 1.02<br>(0.91, 1.14) | 0.75<br>(0.61, 0.92) |
| <b>Jun</b>  | 1.03<br>(0.81, 1.31) | 0.86<br>(0.73, 1.01) | 0.80<br>(0.65, 0.97) | 0.91<br>(0.57, 1.45) | 0.66<br>(0.52, 0.83) | 0.66<br>(0.51, 0.85) | 1.21<br>(0.81, 1.80) | 1.16<br>(0.95, 1.42) | 1.21<br>(0.86, 1.72) | 1.21<br>(0.65, 2.24) | 1.02<br>(0.91, 1.14) | 1.04<br>(0.85, 1.28) |
| <b>Jul</b>  | 1.03<br>(0.81, 1.31) | 0.86<br>(0.73, 1.00) | 0.80<br>(0.65, 0.97) | 0.91<br>(0.57, 1.45) | 0.66<br>(0.52, 0.83) | 0.66<br>(0.51, 0.85) | 1.21<br>(0.81, 1.80) | 1.16<br>(0.95, 1.42) | 1.21<br>(0.86, 1.72) | 1.21<br>(0.65, 2.24) | 1.02<br>(0.91, 1.14) | 1.45<br>(1.07, 1.95) |
| <b>Aug</b>  | 1.03<br>(0.81, 1.31) | 0.86<br>(0.74, 1.00) | 0.80<br>(0.65, 0.97) | 0.91<br>(0.57, 1.45) | 0.66<br>(0.52, 0.83) | 0.97<br>(0.83, 1.14) | 1.21<br>(0.81, 1.80) | 1.16<br>(0.95, 1.42) | 1.21<br>(0.86, 1.72) | 1.21<br>(0.65, 2.24) | 1.02<br>(0.91, 1.14) | 0.72<br>(0.60, 0.87) |
| <b>Sep</b>  | 1.03<br>(0.81, 1.31) | 0.86<br>(0.75, 0.99) | 0.80<br>(0.65, 0.97) | 0.91<br>(0.57, 1.45) | 0.92<br>(0.78, 1.09) | 0.97<br>(0.83, 1.14) | 1.21<br>(0.81, 1.80) | 1.16<br>(0.95, 1.42) | 1.21<br>(0.86, 1.72) | 1.21<br>(0.65, 2.24) | 1.02<br>(0.91, 1.14) | 0.73<br>(0.61, 0.87) |
| <b>Oct</b>  | 1.03<br>(0.81, 1.31) | 0.86<br>(0.75, 0.99) | 0.80<br>(0.65, 0.97) | 0.91<br>(0.57, 1.45) | 0.92<br>(0.78, 1.09) | 0.97<br>(0.83, 1.14) | 1.21<br>(0.81, 1.80) | 1.16<br>(0.95, 1.42) | 1.21<br>(0.86, 1.72) | 1.21<br>(0.65, 2.24) | 1.02<br>(0.91, 1.14) | 0.73<br>(0.62, 0.87) |
| <b>Nov</b>  | 1.03<br>(0.81, 1.31) | 0.86<br>(0.76, 0.98) | 0.80<br>(0.65, 0.97) | 0.91<br>(0.57, 1.45) | 0.92<br>(0.78, 1.09) | 0.97<br>(0.83, 1.14) | 1.21<br>(0.81, 1.80) | 1.16<br>(0.95, 1.42) | 1.21<br>(0.86, 1.72) | 1.21<br>(0.65, 2.24) | 1.02<br>(0.91, 1.14) | 0.74<br>(0.63, 0.87) |
| <b>Dec</b>  | 1.03<br>(0.81, 1.31) | 0.86<br>(0.76, 0.98) | 0.80<br>(0.65, 0.97) | 0.91<br>(0.57, 1.45) | 0.92<br>(0.78, 1.09) | 0.97<br>(0.83, 1.14) | 1.21<br>(0.81, 1.80) | 1.16<br>(0.95, 1.42) | 1.21<br>(0.86, 1.72) | 1.21<br>(0.65, 2.24) | 1.02<br>(0.91, 1.14) | 0.75<br>(0.64, 0.87) |

| 2021       |                         |                         |                         |                         |                         |                         |                         |                         |                         |                         |                         |                         |
|------------|-------------------------|-------------------------|-------------------------|-------------------------|-------------------------|-------------------------|-------------------------|-------------------------|-------------------------|-------------------------|-------------------------|-------------------------|
| <b>Jan</b> | 1.03<br>(0.81,<br>1.31) | 0.86<br>(0.76,<br>0.98) | 0.80<br>(0.65,<br>0.97) | 0.91<br>(0.57,<br>1.45) | 0.92<br>(0.78,<br>1.09) | 0.97<br>(0.83,<br>1.14) | 1.21<br>(0.81,<br>1.80) | 1.16<br>(0.95,<br>1.42) | 1.21<br>(0.86,<br>1.72) | 1.21<br>(0.65,<br>2.24) | 1.02<br>(0.91,<br>1.14) | 0.75<br>(0.65,<br>0.87) |
| <b>Feb</b> | 1.03<br>(0.81,<br>1.31) | 0.87<br>(0.76,<br>0.98) | 0.80<br>(0.65,<br>0.97) | 0.91<br>(0.57,<br>1.45) | 0.92<br>(0.78,<br>1.09) | 0.97<br>(0.83,<br>1.14) | 1.21<br>(0.81,<br>1.80) | 1.16<br>(0.95,<br>1.42) | 1.21<br>(0.86,<br>1.72) | 1.21<br>(0.65,<br>2.24) | 1.02<br>(0.91,<br>1.14) | 0.76<br>(0.66,<br>0.88) |
| <b>Mar</b> | 1.03<br>(0.81,<br>1.31) | 0.87<br>(0.76,<br>0.98) | 0.80<br>(0.65,<br>0.97) | 0.91<br>(0.57,<br>1.45) | 0.92<br>(0.78,<br>1.09) | 0.97<br>(0.83,<br>1.14) | 1.21<br>(0.81,<br>1.80) | 1.16<br>(0.95,<br>1.42) | 1.21<br>(0.86,<br>1.72) | 1.21<br>(0.65,<br>2.24) | 1.02<br>(0.91,<br>1.14) | 0.77<br>(0.67,<br>0.88) |
| <b>Apr</b> | 1.03<br>(0.81,<br>1.31) | 0.87<br>(0.76,<br>0.99) | 0.80<br>(0.65,<br>0.97) | 0.91<br>(0.57,<br>1.45) | 0.92<br>(0.78,<br>1.09) | 0.97<br>(0.83,<br>1.14) | 1.21<br>(0.81,<br>1.80) | 1.16<br>(0.95,<br>1.42) | 1.21<br>(0.86,<br>1.72) | 1.21<br>(0.65,<br>2.24) | 1.02<br>(0.91,<br>1.14) | 0.78<br>(0.67,<br>0.89) |
| <b>May</b> | 1.03<br>(0.81,<br>1.31) | 0.87<br>(0.76,<br>0.99) | 0.80<br>(0.65,<br>0.97) | 0.91<br>(0.57,<br>1.45) | 0.92<br>(0.78,<br>1.09) | 0.97<br>(0.83,<br>1.14) | 1.21<br>(0.81,<br>1.80) | 1.16<br>(0.95,<br>1.42) | 1.21<br>(0.86,<br>1.72) | 1.21<br>(0.65,<br>2.24) | 1.02<br>(0.91,<br>1.14) | 0.78<br>(0.68,<br>0.90) |
| <b>Jun</b> | 1.03<br>(0.81,<br>1.31) | 0.87<br>(0.76,<br>1.00) | 0.80<br>(0.65,<br>0.97) | 0.91<br>(0.57,<br>1.45) | 0.92<br>(0.78,<br>1.09) | 0.97<br>(0.83,<br>1.14) | 1.21<br>(0.81,<br>1.80) | 1.16<br>(0.95,<br>1.42) | 1.21<br>(0.86,<br>1.72) | 1.21<br>(0.65,<br>2.24) | 1.02<br>(0.91,<br>1.14) | 0.79<br>(0.68,<br>0.92) |
| <b>Jul</b> | 1.03<br>(0.81,<br>1.31) | 0.87<br>(0.76,<br>1.01) | 0.80<br>(0.65,<br>0.97) | 0.91<br>(0.57,<br>1.45) | 0.92<br>(0.78,<br>1.09) | 0.97<br>(0.83,<br>1.14) | 1.21<br>(0.81,<br>1.80) | 1.16<br>(0.95,<br>1.42) | 1.21<br>(0.86,<br>1.72) | 1.21<br>(0.65,<br>2.24) | 1.02<br>(0.91,<br>1.14) | 0.80<br>(0.68,<br>0.93) |
| <b>Aug</b> | 1.03<br>(0.81,<br>1.31) | 0.87<br>(0.76,<br>1.02) | 0.80<br>(0.65,<br>0.97) | 0.91<br>(0.57,<br>1.45) | 0.92<br>(0.78,<br>1.09) | 0.97<br>(0.83,<br>1.14) | 1.21<br>(0.81,<br>1.80) | 1.16<br>(0.95,<br>1.42) | 1.21<br>(0.86,<br>1.72) | 1.21<br>(0.65,<br>2.24) | 1.02<br>(0.91,<br>1.14) | 0.80<br>(0.68,<br>0.95) |
| <b>Sep</b> | 1.03<br>(0.81,<br>1.31) | 0.88<br>(0.74,<br>1.04) | 0.80<br>(0.65,<br>0.97) | 0.91<br>(0.57,<br>1.45) | 0.92<br>(0.78,<br>1.09) | 0.97<br>(0.83,<br>1.14) | 1.21<br>(0.81,<br>1.80) | 1.16<br>(0.95,<br>1.42) | 1.21<br>(0.86,<br>1.72) | 1.21<br>(0.65,<br>2.24) | 1.02<br>(0.91,<br>1.14) | 0.81<br>(0.68,<br>0.96) |
| <b>Oct</b> | 1.03<br>(0.81,<br>1.31) | 0.88<br>(0.74,<br>1.04) | 0.80<br>(0.65,<br>0.97) | 0.91<br>(0.57,<br>1.45) | 0.92<br>(0.78,<br>1.09) | 0.97<br>(0.83,<br>1.14) | 1.21<br>(0.81,<br>1.80) | 1.16<br>(0.95,<br>1.42) | 1.21<br>(0.86,<br>1.72) | 1.21<br>(0.65,<br>2.24) | 1.02<br>(0.91,<br>1.14) | 0.82<br>(0.68,<br>0.98) |
| <b>Nov</b> | 1.03<br>(0.81,<br>1.31) | 0.88<br>(0.74,<br>1.05) | 0.80<br>(0.65,<br>0.97) | 0.91<br>(0.57,<br>1.45) | 0.92<br>(0.78,<br>1.09) | 0.97<br>(0.83,<br>1.14) | 1.21<br>(0.81,<br>1.80) | 1.16<br>(0.95,<br>1.42) | 1.21<br>(0.86,<br>1.72) | 1.21<br>(0.65,<br>2.24) | 1.02<br>(0.91,<br>1.14) | 0.83<br>(0.68,<br>1.00) |
| <b>Dec</b> | 1.03<br>(0.81,<br>1.31) | 0.88<br>(0.73,<br>1.06) | 0.80<br>(0.65,<br>0.97) | 0.91<br>(0.57,<br>1.45) | 0.92<br>(0.78,<br>1.09) | 0.97<br>(0.83,<br>1.14) | 1.21<br>(0.81,<br>1.80) | 1.16<br>(0.95,<br>1.42) | 1.21<br>(0.86,<br>1.72) | 1.21<br>(0.65,<br>2.24) | 1.02<br>(0.91,<br>1.14) | 0.83<br>(0.68,<br>1.03) |

**eTable 5. Estimated cumulative fitted and counterfactual number of cancer cases, difference, and percent difference by site as of December 31, 2021**

| Cancer site                             | Fitted cancer cases (n) | Counterfactual cancer cases (n) | Cumulative difference | Percent cumulative difference* (95% CI) |
|-----------------------------------------|-------------------------|---------------------------------|-----------------------|-----------------------------------------|
| <b>Overall</b>                          | 12,458                  | 13,150                          | -692                  | -5.3 (-9.2, -1.0)                       |
| <b>Breast</b>                           | 1,662                   | 1,935                           | -273                  | -14.1 (-22.5, -5.8)                     |
| <b>Lung</b>                             | 1,600                   | 1,732                           | -132                  | -7.6 (-15.5, +0.5)                      |
| <b>Prostate</b>                         | 1,674                   | 1,773                           | -99                   | -5.6 (-17.2, +6.9)                      |
| <b>Colon</b>                            | 955                     | 1,087                           | -133                  | -12.2 (-20.9, -2.7)                     |
| <b>Rectal</b>                           | 512                     | 499                             | +12                   | +2.4 (-21.7, +32.6)                     |
| <b>Hematologic</b>                      | 1155                    | 1121                            | +34                   | +3.0 (-7.6, +14.6)                      |
| <b>Urinary</b>                          | 744                     | 843                             | -99                   | -11.7 (-21.9, -0.3)                     |
| <b>Unknown primary</b>                  | 400                     | 429                             | -29                   | -6.8 (-24.4, +11.6)                     |
| <b>Head and neck</b>                    | 449                     | 472                             | -24                   | -5.0 (-18.5, +9.6)                      |
| <b>Brain and central nervous system</b> | 164                     | 220                             | -56                   | -25.6 (-41.7, -4.8)                     |
| <b>Gynecologic</b>                      | 817                     | 809                             | +8                    | +1.0 (-9.9–12.8)                        |
| <b>Other digestive</b>                  | 863                     | 873                             | -10                   | -1.2 (-12.2, +10.9)                     |
| <b>Melanoma</b>                         | 524                     | 592                             | -68                   | -11.5 (-24.4, +4.4)                     |
| <b>Pancreatic</b>                       | 365                     | 340                             | +25                   | +7.3 (-12.1, +28.1)                     |
| <b>Endocrine</b>                        | 305                     | 305                             | 0                     | 0.0 (-22.7, +25.7)                      |
| <b>Other</b>                            | 271                     | 246                             | +25                   | +10.3 (-10.1, +35.2)                    |

\* A minus sign indicates a deficit and a plus sign indicates a surplus. Abbreviations: CI, confidence interval



**eFigure 1. Incidence rate for breast cancer for women <50, 50 to 74, and ≥75 years of age by month, Manitoba**

**<50 years of age**

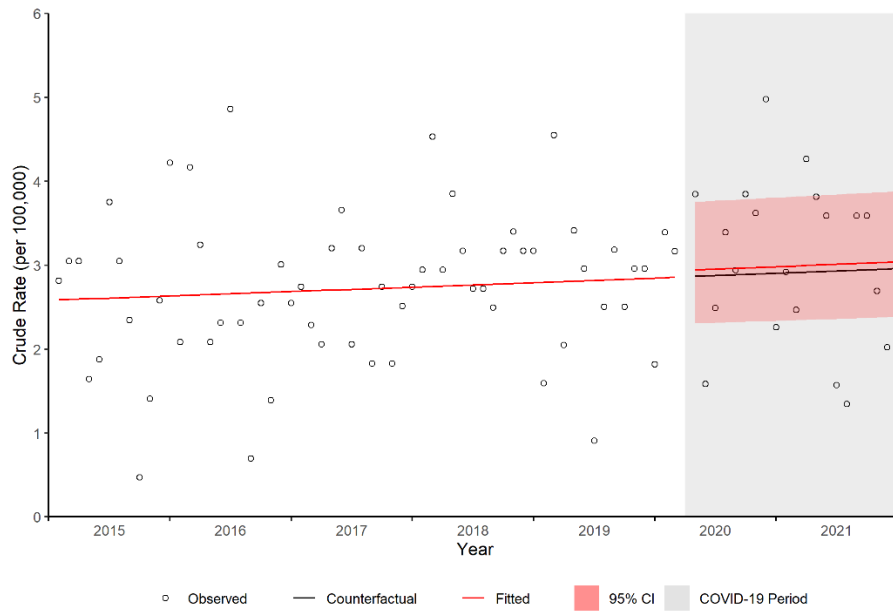

**50 to 74 years of age**

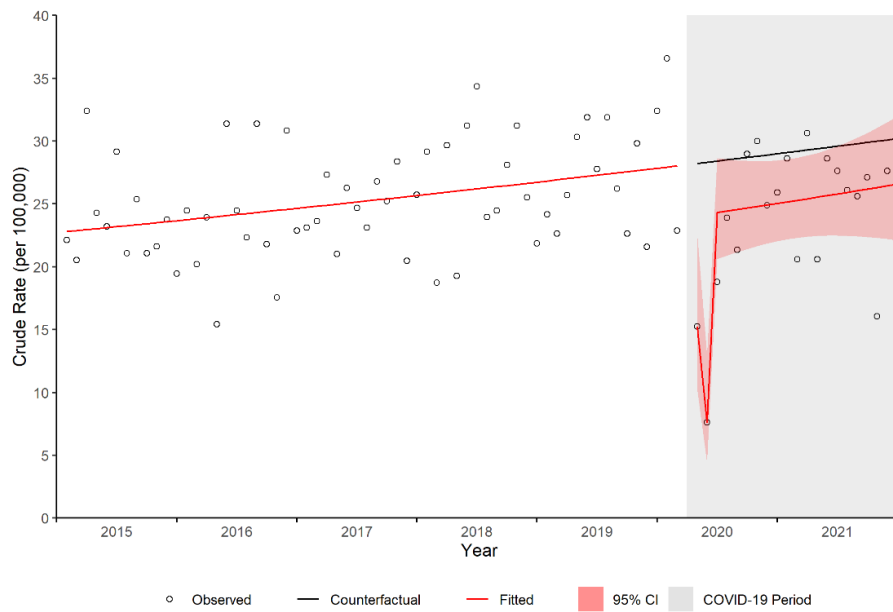

# 75+ years of age

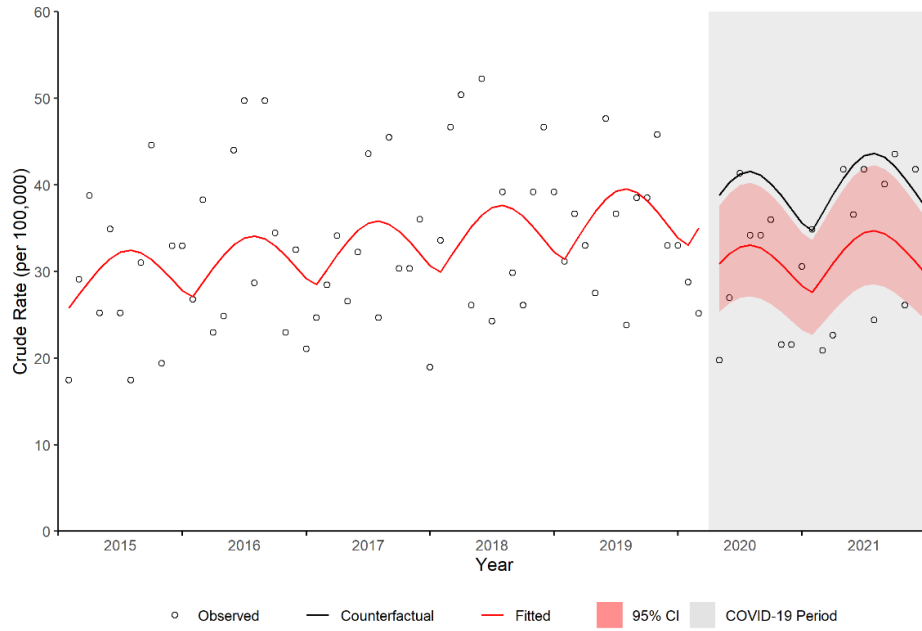

**eFigure 2. Incidence rate for lung cancer for individuals <50 years, 50 to 74, and ≥75 years of age by month, Manitoba**

**<50 years of age**

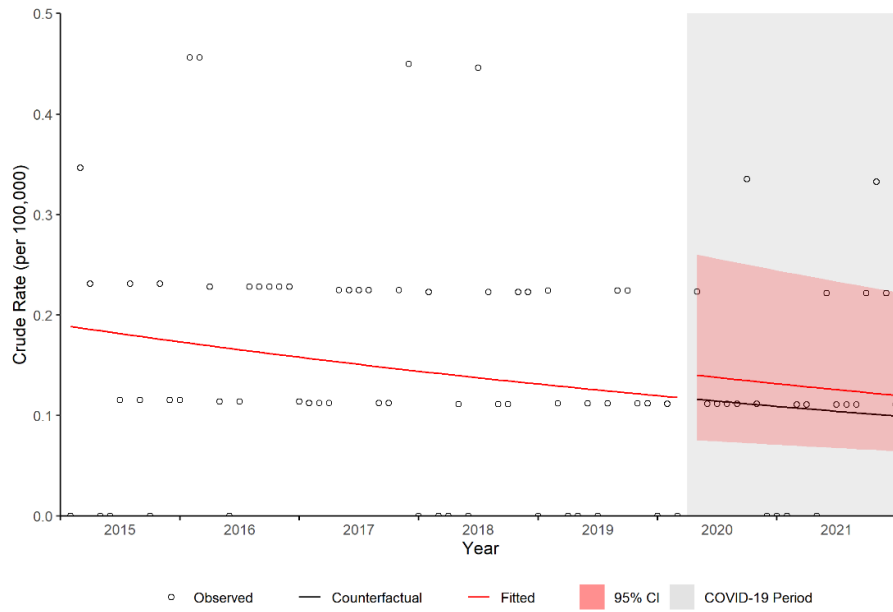

**50-74 years of age**

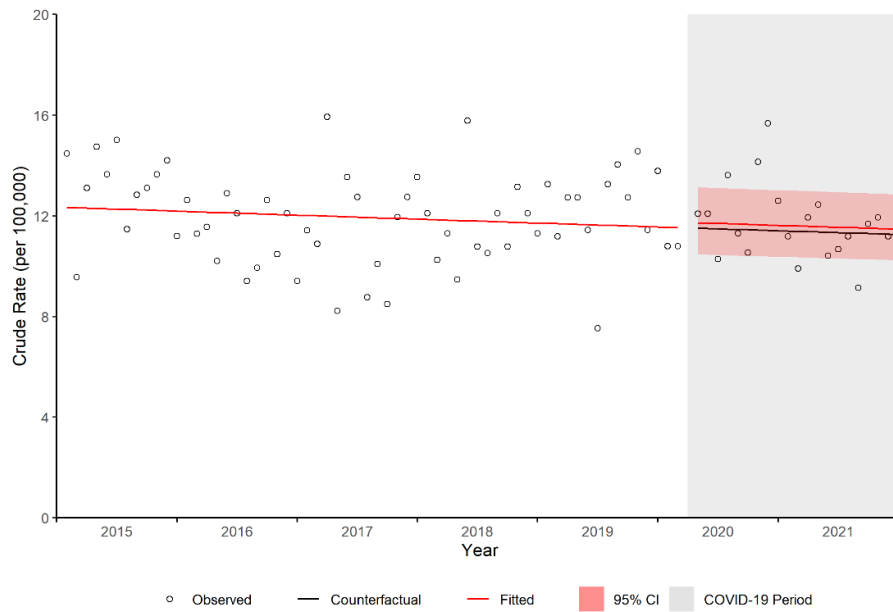

## 75+ years of age

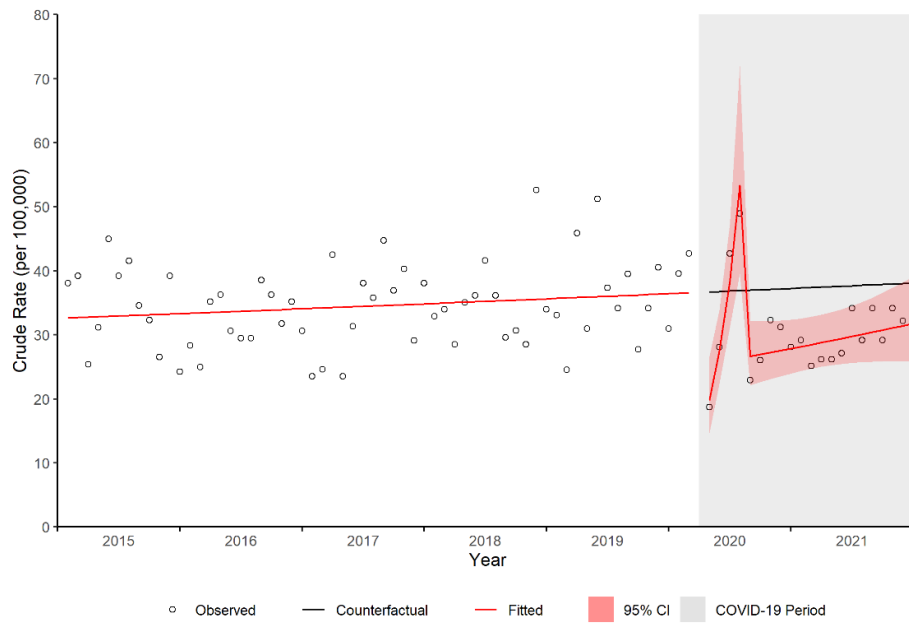

**eFigure 3. Incidence rate for colon cancer for individuals <50, 50 to 74, and ≥75 years of age by month, Manitoba**

**<50 years of age**

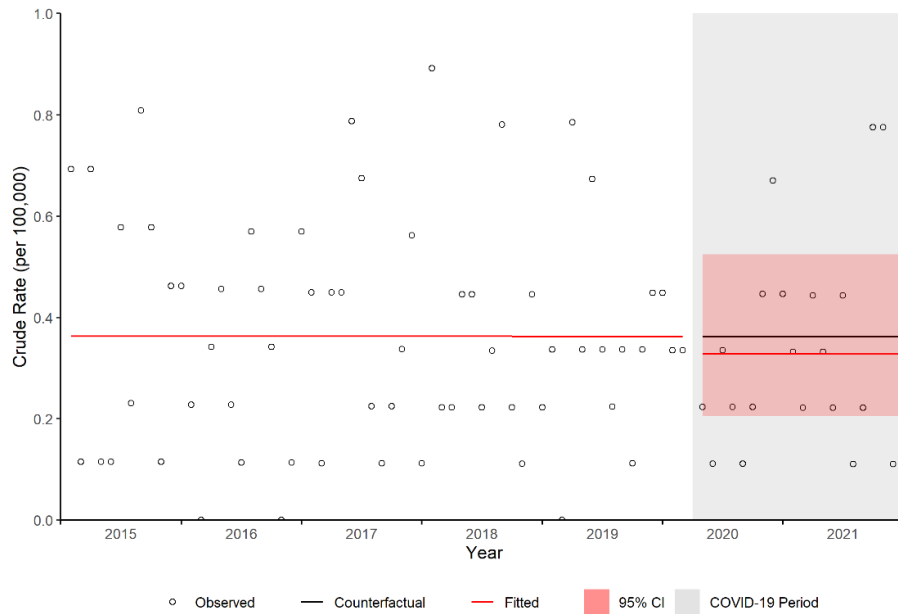

**50-74 years of age**

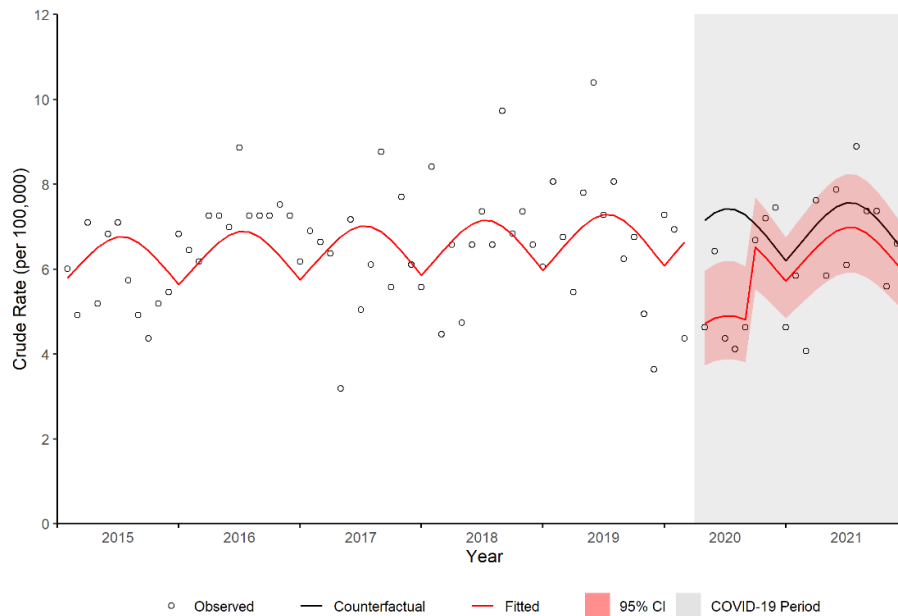

## 75+ years of age

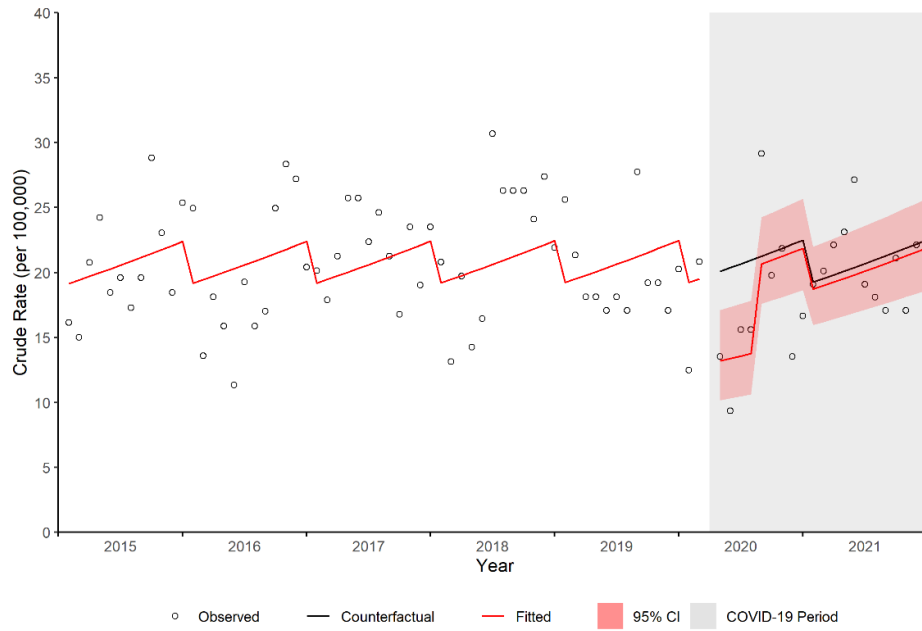

**eFigure 4. incidence rate for rectal cancer for individuals <50 years of age, 50 to 74, and ≥75 years of age by month, Manitoba**

**<50 years of age**

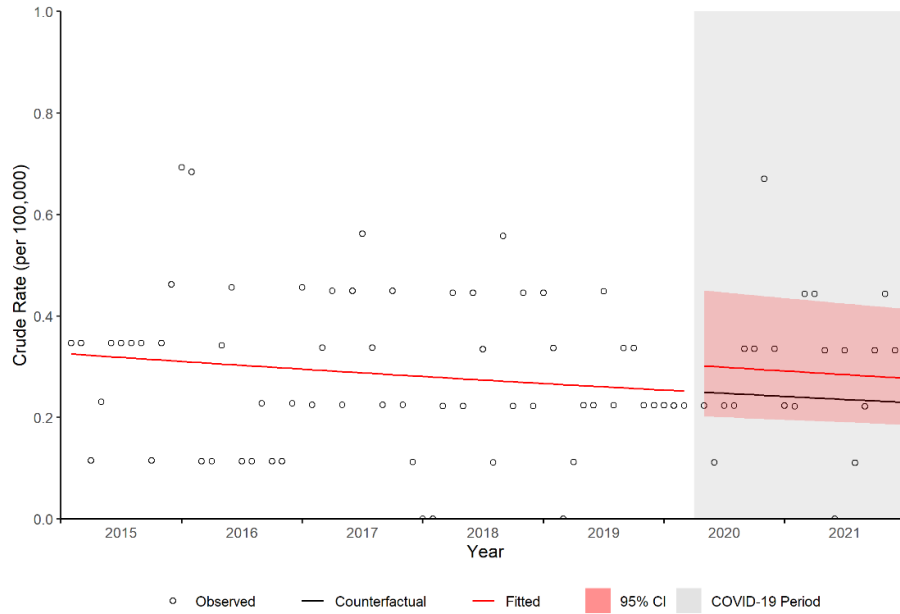

**50-74 years of age**

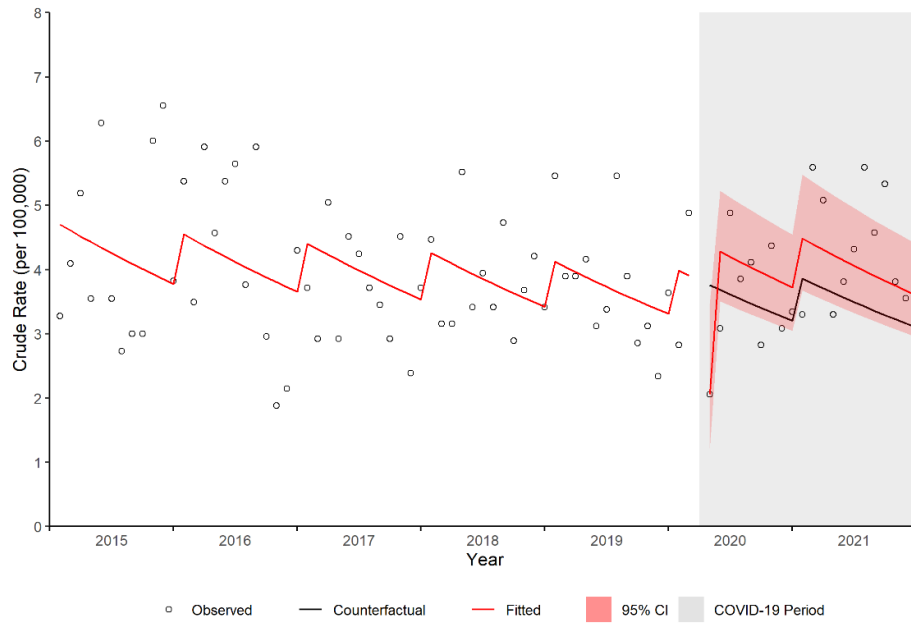

# 75+ years of age

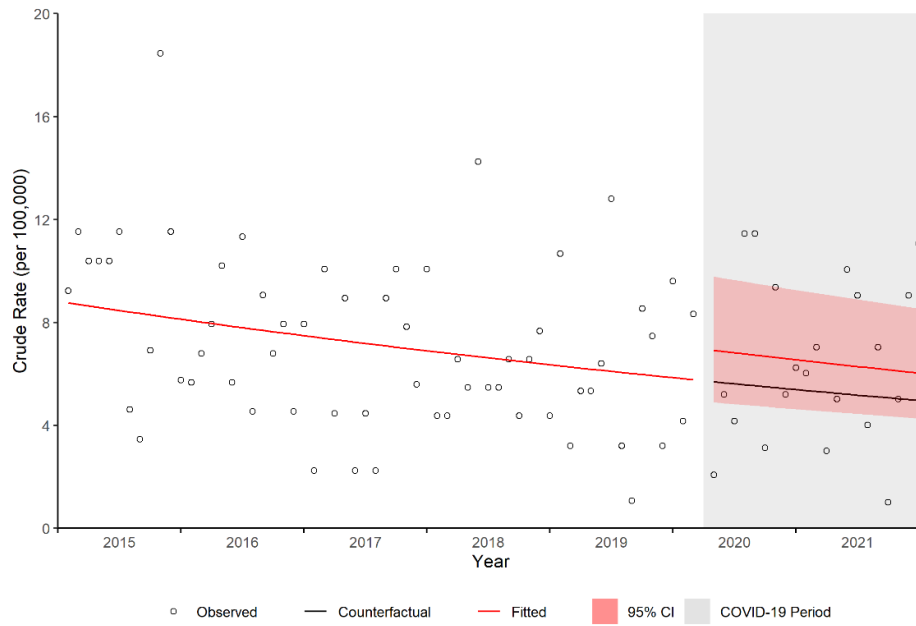



**eAppendix A. Cancer types included in each category and International Classification of Diseases for Oncology version 3 (ICD-O-3) codes**

| Category                                | Cancer sites                  | ICD-O-3 codes                                                                                                                                                                                                                                                                           |
|-----------------------------------------|-------------------------------|-----------------------------------------------------------------------------------------------------------------------------------------------------------------------------------------------------------------------------------------------------------------------------------------|
| <b>Breast</b>                           | Female breast                 | C500-C509                                                                                                                                                                                                                                                                               |
| <b>Lung</b>                             | Small cell and non-small cell | C340-C349                                                                                                                                                                                                                                                                               |
| <b>Prostate</b>                         | Prostate                      | C619                                                                                                                                                                                                                                                                                    |
| <b>Colon</b>                            | Colon                         | C180-189, C260                                                                                                                                                                                                                                                                          |
| <b>Rectal</b>                           | Rectal and rectosigmoid       | C199, C209                                                                                                                                                                                                                                                                              |
| <b>Hematologic</b>                      | Hodgkin lymphoma              | 9650-9667                                                                                                                                                                                                                                                                               |
|                                         | Non-Hodgkin lymphoma          | 9590-9597, 9670-9671, 9673, 9675, 9678-9680, 9684, 9687-9691, 9695, 9698-9702, 9705, 9708-9709, 9712, 9714-9719, 9724-9729, 9735, 9737, 9738, 9811-9818 (except C420, C421, C424) 9823 (except C420, C421, C424) 9827 (except C420, C421, C424) 9837 (except C420, C421, C424)          |
|                                         | Myeloma                       | 9731-9732, 9734                                                                                                                                                                                                                                                                         |
|                                         | Acute lymphocytic leukemia    | 9826, 9835-9836 9811-9818 (only C421) 9837 (only C421)                                                                                                                                                                                                                                  |
|                                         | Chronic lymphocytic leukemia  | 9823 (only C421, if SLL C77)                                                                                                                                                                                                                                                            |
|                                         | Acute myeloid leukemia        | 9840, 9861, 9865-9867, 9869, 9871-9874, 9895-9897, 9898, 9910-9911, 9920                                                                                                                                                                                                                |
|                                         | Acute monocytic leukemia      | 9891                                                                                                                                                                                                                                                                                    |
|                                         | Chronic myeloid leukemia      | 9863, 9875-9876, 9945-9946                                                                                                                                                                                                                                                              |
|                                         | Other leukemia                | 9733, 9742, 9800, 9801, 9805-9809, 9820, 9831-9834, 9860, 9870, 9930, 9931, 9940, 9948, 9963, 9964 9827 (only C421)                                                                                                                                                                     |
| <b>Urinary</b>                          | Bladder                       | C670-C679                                                                                                                                                                                                                                                                               |
|                                         | Kidney and renal pelvis       | C649, C659                                                                                                                                                                                                                                                                              |
|                                         | Ureter                        | C669                                                                                                                                                                                                                                                                                    |
|                                         | Other urinary system          | C680-689                                                                                                                                                                                                                                                                                |
| <b>Unknown primary</b>                  | Unknown primary               | 9740-9741, 9750-9769, 9950, 9960-9962, 9965-9967, 9970-9971, 9975, 9980, 9982-9987, 9989, 9991-9992, C420-C424 (except 9050-9055, 9140, 9590-9992) C760-C768 (except 9050-9055, 9140, 9590-9992) C770-C779 (except 9050-9055, 9140, 9590-9992) C809 (except 9050-9055, 9140, 9590-9992) |
| <b>Head and neck</b>                    | Buccal cavity and pharynx     | C00-C14                                                                                                                                                                                                                                                                                 |
|                                         | Larynx                        | C320-C329                                                                                                                                                                                                                                                                               |
|                                         | Other non-lung respiratory    | C300-C301, C310-C319, C384, C339, C381-C383, C388, C390-C399                                                                                                                                                                                                                            |
| <b>Brain and central nervous system</b> | Brain                         | C710-C719                                                                                                                                                                                                                                                                               |
|                                         | Other nervous system          | C710-C719 (953), C700-C709, C720-C729                                                                                                                                                                                                                                                   |
| <b>Gynecologic</b>                      | Cervix uteri                  | C530-C539                                                                                                                                                                                                                                                                               |
|                                         | Corpus uteri                  | C540-C549                                                                                                                                                                                                                                                                               |
|                                         | Uterus, NOS                   | C559                                                                                                                                                                                                                                                                                    |
|                                         | Ovary                         | C569                                                                                                                                                                                                                                                                                    |
|                                         | Other female genital system   | C529, C510-C519, C570-C589                                                                                                                                                                                                                                                              |
| <b>Category</b>                         | <b>Cancer sites</b>           | <b>ICD-O-3 codes</b>                                                                                                                                                                                                                                                                    |
| <b>Other digestive</b>                  | Esophagus                     | C150-C159                                                                                                                                                                                                                                                                               |
|                                         | Stomach                       | C160-C169                                                                                                                                                                                                                                                                               |

|                   |                               |                                                   |
|-------------------|-------------------------------|---------------------------------------------------|
|                   | Small intestine               | C170-C179                                         |
|                   | Anus                          | C210-C212, C218                                   |
|                   | Liver                         | C220                                              |
|                   | Gallbladder                   | C239                                              |
|                   | Other digestive system        | C240-C249, C221, C480, C481-C482, C268-C269, C488 |
| <b>Melanoma</b>   | Melanoma                      | C440-C449 (8720-8790)                             |
| <b>Pancreatic</b> | Pancreatic                    | C250-C259                                         |
| <b>Endocrine</b>  | Thyroid                       | C739                                              |
|                   | Other endocrine               | C379, C740-C749, C750-C759                        |
| <b>Other</b>      | Bones and joints              | C400-C419                                         |
|                   | Soft tissue (including heart) | C380, C470-C479, C490-C499                        |
|                   | Mesothelioma                  | 9050-9055                                         |
|                   | Kaposi sarcoma                | 9140                                              |
|                   | Eye                           | C690-C699                                         |
|                   | Male breast                   | C500-C509                                         |
|                   | Testis                        | C620-C629                                         |
|                   | Penis                         | C600-C609                                         |
|                   | Other male genital system     | C630-C639                                         |

## eAppendix B. R code and simulated data for an interrupted time series analysis

```
#####  
### Load packages  
#####  
library(haven)  
library(splines)  
library(Hmisc)  
library(MASS)  
library(lattice)  
library(DHARMA)  
library(ggplot2)  
library(car)  
library(multcomp)  
library(lmtest)  
library(glmmTMB)  
  
#####  
### Simulated dataset  
#####  
  
# This simulated dataset contains the following variables:  
# - count: number of cases  
# - stdpop: age-standardized population  
# - stdrate: age-standardized incidence rate per 100,000  
# - year: year of diagnosis  
# - month: calendar month (for seasonality)  
# - time: time since beginning of study period (Jan 2015)  
# - covid: COVID restriction indicator (0=before March 2020, 1=after March 2020)  
  
count <- c(523, 539, 489, 537, 589, 596, 506, 484, 547, 564, 570, 488,  
560, 546, 504, 539, 525, 577, 555, 514, 587, 596, 597, 552,  
565, 552, 525, 596, 611, 605, 550, 510, 531, 560, 597, 563,  
604, 557, 553, 559, 589, 578, 606, 533, 524, 606, 569, 501,  
576, 589, 574, 626, 598, 577, 599, 520, 617, 614, 649, 591,  
619, 634, NA, 432, 485, 642, 629, 574, 623, 594, 571, 552,  
633, 569, 558, 609, 635, 616, 545, 539)  
stdpop <- c(1298008, 1303355, 1305184, 1301240, 1298734, 1299299, 1295466, 1292982, 1303310, 1297892,  
1297353, 1290947,  
1319253, 1317550, 1322917, 1322676, 1323532, 1321520, 1325732, 1329176, 1331195, 1329771,  
1324808, 1323016,  
1348566, 1346798, 1352188, 1346474, 1348969, 1350947, 1356338, 1359991, 1351885, 1354543,  
1352257, 1351977,  
1375947, 1376385, 1377656, 1379068, 1380944, 1372174, 1385761, 1379780, 1378726, 1388695,  
1379005, 1384956,  
1413056, 1396460, 1406157, 1401348, 1411815, 1410403, 1403214, 1410865, 1417457, 1410548,  
1402133, 1414184,  
1428629, 1424773, NA, 1437775, 1440587, 1450485, 1435894, 1436122, 1440942, 1431486,  
1428909, 1441184,  
1468096, 1454458, 1455076, 1479103, 1471497, 1484575, 1492564, 1480314)  
stdrate<-(count/stdpop)*100000  
year <- c(rep(2015,12),rep(2016,12),rep(2017,12),rep(2018,12),rep(2019,12),rep(2020,12),rep(2021,8))  
month <- c(rep(1:12, times=6), c(1:8))  
time <- c(1:80)  
covid <- c(rep(0,62), NA, rep(1,17))  
  
inc<-as.data.frame(cbind(count,stdpop,stdrate,year,month,time,covid))  
  
## simple plot indicates sharp drop at the beginning of the pandemic
```

```

plot(inc$time,inc$stdrate, ylim=c(0,60))

# incidence dataset with March 2020 removed - needed for predictions & mean-variance plot
inc2 <- subset(inc, !(year==2020 & month==3))

# dataset to plot counterfactual (need covid = 0 for all months)
inc_counter <- data.frame(covid=0,
                          stdpop=inc$stdpop,
                          time=inc$time,
                          month=inc$month,
                          covid1=0,
                          covid2=0)

# add dummy covid period variables for better time interactions (see earlier plot)
inc$covid1 <- with(inc,ifelse(year==2020 & month %in% 4:5, 1, 0))
inc$covid2 <- with(inc,ifelse((year==2020 & month %in% 6:12) | year==2021, 1, 0))

#####
### Diagnostics
#####

### Mean-Variance Plot to determine appropriate GLM model

# Poisson model
pois <- glm(count ~ offset(log(stdpop)) + covid1*time + covid2*time,
            family='poisson', data=inc)

# Negative binomial (NB1)
nb1<-glmmTMB(count ~ offset(log(stdpop)) + covid1*time + covid2*time,
            family=nbinom1, data=inc)
out_nb1<-summary(nb1)

# Negative binomial model (NB2)
nb2 <- glm.nb(count ~ offset(log(stdpop)) + covid1*time + covid2*time,
            data=inc)

# gamma regression
gamma_log <- glm(count ~ offset(log(stdpop)) + covid1*time + covid2*time,
            data = inc, family=Gamma(link='log'))
out_gamma <- summary(gamma_log)

# inverse gaussian
inv_gauss <- glm(count ~ offset(log(stdpop)) + covid1*time + covid2*time,
            data = inc, family='inverse.gaussian'(link='log'))
out_inv_gauss <- summary(inv_gauss)

# generalized Poisson
gen_pois<-glmmTMB(count ~ offset(log(stdpop)) + covid1*time + covid2*time,
            family=genpois, data=inc)
out_gen_pois<-summary(gen_pois)

#### plotting mean-variance relationship

xb <- predict(pois) # linear predictor
g <- cut2(xb, g=5) # cut linear predictor into multiple equally-sized groups (in this case, 5 groups)
m <- tapply(inc2$count, g, mean)

```

```

v <- tapply(inc2$count, g, var)

# Mean-Variance Relationship plot, which does not provide a clearly appropriate distribution
plot(m, v,
     xlab='Mean',
     ylab='Variance',
     main='Mean-Variance Relationship',
     xlim=c(500,650),
     ylim=c(0,3000))

x <- seq(500,650,1)
lines(x, x, col='black') # Poisson model
lines(x, x*(1+out_nb1$sigma), col='blue') # NB1 model
lines(x, x*(1+x/nb2$theta), col='red') # NB2 model
lines(x, (x^2)*(out_gamma$dispersion), col='green') # gamma (log) model
lines(x, (x^3)*(out_inv_gauss$dispersion), col='magenta') # gaussian inverse
lines(x, x*(out_gen_pois$sigma), col='orange') # generalized Poisson
legend('topleft',
      col=c('black','blue','red','green','magenta','orange'),
      lty=c(1,1,1,1,1,1),
      legend=c('Poisson','NB1','NB2','Gamma (log)','Gaussian inverse','Generalized Poisson'),
      cex=0.5)

# model fit (using DHARMA package) ## Poisson model demonstrates overdispersion; other models demonstrate
good fit
check_pois <- simulateResiduals(fittedModel=pois, n=1000)
plot(check_pois)
testDispersion(check_pois)

check_nb1 <- simulateResiduals(fittedModel=nb1, n=1000)
plot(check_nb1)
testDispersion(check_nb1)

check_nb2 <- simulateResiduals(fittedModel=nb2, n=1000)
plot(check_nb2)
testDispersion(check_nb2)

check_gamma <- simulateResiduals(fittedModel=gamma_log, n=1000)
plot(check_gamma)
testDispersion(check_gamma)

check_invg <- simulateResiduals(fittedModel=inv_gauss, n=1000)
plot(check_invg)
testDispersion(check_invg)

check_genpois <- simulateResiduals(fittedModel=gen_pois, n=1000)
plot(check_genpois)
testDispersion(check_genpois)

#### AIC between models (little difference between models that allow overdispersion)
AIC(pois) ## highest value
AIC(nb1)
AIC(nb2)
AIC(gamma_log)
AIC(inv_gauss)
AIC(gen_pois)

### McFadden between models (little difference between models with overdispersion)

```

```

null <- glm(count ~ offset(log(stdpop)), family='poisson', data=inc)
McFad_1 <- function(mod){
  return(round(1-((logLik(mod)[1]-mod$rank)/logLik(null)[1]),3))
}
McFad_2 <- function(mod){
  return(round(1-((logLik(mod)[1]-(length(mod$fit$par)-1))/logLik(null)[1]),3))
}

McFad_1(pois) ## lowest value
McFad_2(nb1)
McFad_1(nb2)
McFad_1(gamma_log)
McFad_1(inv_gauss)
McFad_2(gen_pois)

#####
### check for monthly/seasonal effects
#####

## NB1 model selected from overdispersed models

nb1 <- glmmTMB(count ~ offset(log(stdpop)) + covid1*time + covid2*time + ns(month, df=6), ## splines used on
month variable
  data=inc, family=nbinom1)
McFad_2(nb1) ## R^2 decreases and then increases (df=5 and 6)
include warnings)

check_nb1 <- simulateResiduals(fittedModel=nb1, n=1000)
plot(check_nb1)
testDispersion(check_nb1) ## df=5 and 6 demonstrate poorer fit than without
monthly/seasonal effect included

#####
### Final ITS model
#####

### NB1 model selected without monthly/seasonal effect included

model <- glmmTMB(count ~ offset(log(stdpop)) + covid1*time + covid2*time, data=inc, family=nbinom1)

summary(model)
confint(model) # 95% CI
Anova(model, type='III')

##
## try including a typical covid*time interaction instead of dummy covid variables,
## modifying the rest of the code, and produce the ITS plot to see the impact

#####
### Calculate ratios and 95% CI
#####

inc_ratio <- inc

model_ratio <- glmmTMB(count ~ offset(log(stdpop)) + covid1*time + covid2*time,

```

```

data=inc_ratio, family=nbinom1)

summary(model_ratio)
colnames(getME(model_ratio, name='X'))          ## determines values to put in matrix (intercept,
intervention, time)
#names(coef(model_ratio))                      ## alternative when using non-glmmTMB model

# add covid:time column for interactions
inc_ratio$covid1_time <- inc_ratio$covid1 * inc_ratio$time
inc_ratio$covid2_time <- inc_ratio$covid2 * inc_ratio$time

# loop to extract ratios and 95% CI when including an interaction term
first_time <- 64 # value for the first time value during COVID
last_time <- 80 # value for the last time value during COVID

mean <- NULL # NULL vectors to capture values in loop
se <- NULL
time <- NULL

for(i in first_time:last_time) {

  inc_ratio_int <- subset(inc_ratio, time==i)    # i refers to number in loop (from "first_time" to "last_time")

  K1 <- with(inc_ratio_int,(matrix(c(0, covid1, time, covid2, covid1_time, covid2_time), 1)))
  K2 <- with(inc_ratio_int,(matrix(c(0, 0, time, 0, 0, 0), 1)))

  K <- K1 - K2

  t <- glht(model_ratio, linfct = K)            # calls model object and comparison matrices
  out <- summary(t, test = adjusted('none'))

  mean1 <- out$test$coefficients
  se1 <- out$test$sigma

  time <- c(time,i)                            # fill NULL vectors with extracted values
  mean <- c(mean,mean1)
  se <- c(se,se1)

}

# ratios and 95% CI
ratio_output <- as.data.frame(cbind(mean,se,time))
ratio_output$ratio <- exp(ratio_output$mean)
ratio_output$low_CI <- exp(ratio_output$mean - (1.96*ratio_output$se))
ratio_output$high_CI <- exp(ratio_output$mean + (1.96*ratio_output$se))

# fitted values
pred <- predict(model, type='response', newdata=inc)
pred[63] <- NA ## set March 2020 predictions to NA

# counterfactual predictions
pred_counter <- predict(model, type='response', newdata=inc_counter)
pred_counter[63] <- NA ## set March 2020 predictions to NA

inc3 <- cbind(inc, pred, pred_counter)

# calculate 95% CI for predicted values in COVID period (pred_counter*ratio CI limits)
inc3_ratio <- merge(inc3, ratio_output, by='time', all.x=TRUE)
inc3_ratio$pred_lower <- with(inc3_ratio, ifelse(covid==1, pred_counter * low_CI, NA))
inc3_ratio$pred_upper <- with(inc3_ratio, ifelse(covid==1, pred_counter * high_CI, NA))

```

```
#####
###      ITS Plot
#####

box <- data.frame(x1=63,x2=84,y1=0,y2=60)
ggplot(data=inc3_ratio) +
  geom_rect(data=box, aes(xmin=x1,xmax=x2,ymin=y1,ymax=y2,fill='grey'), alpha=0.3) +
  geom_point(aes(x=time, y=stdrate, shape=1)) +
  geom_line(aes(x=time, y=pred/stdpop*100000, colour='red')) +
  geom_ribbon(data=subset(inc3_ratio, covid==1), aes(x=time, ymin=pred_lower/stdpop*100000,
ymax=pred_upper/stdpop*100000, fill='red'), alpha=0.2) +
  geom_line(data=subset(inc3_ratio, covid==1), aes(x=time, y=pred_counter/stdpop*100000, linetype='solid')) +
  scale_y_continuous(expand=c(0,0), limits=c(0,60), breaks=seq(0,60,10)) +
  scale_x_continuous(expand=c(0,0), limits=c(0,84),
                    breaks=c(seq(0,84,6)),
                    labels=c("",'2015',"','2016',"','2017',"','2018',"','2019',"','2020',"','2021',"')) +
  labs(x='Years', y='Age-standardized Rate (per 100,000)') +
  theme_bw() +
  theme(panel.grid.major=element_blank(),
        panel.grid.minor=element_blank(),
        panel.border=element_blank(),
        axis.line=element_line(colour='black'),
        axis.ticks.x=element_line(colour=c('black',rep(c(NA,'black'),7))),
        plot.title=element_text(hjust=0.5),
        legend.position='bottom',
        legend.title=element_blank()) +
  guides(colour=guide_legend(order=3),
         fill=guide_legend(order=4),
         linetype=guide_legend(order=2),
         shape=guide_legend(order=1)) +
  scale_colour_identity(guide='legend', label='Fitted') +
  scale_fill_identity(guide='legend', labels=c('95% CI','COVID-19 Period'), breaks=c('red','grey')) +
  scale_linetype_identity(guide='legend', label='Predicted') +
  scale_shape_identity(guide='legend', label='Observed')
```

```
#####
##### Cumulative deficits through parametric bootstrapping
#####
```

```
inc_deficit <- subset(inc3_ratio, covid==1, select=c('year','month','pred','pred_counter'))

inc_deficit$cum_pred <- cumsum(inc_deficit$pred) ## cumulative fitted
inc_deficit$cum_pred_counter <- cumsum(inc_deficit$pred_counter) ## cumulative predicted
inc_deficit$cum_diff <- with(inc_deficit, cum_pred - cum_pred_counter) ## cumulative difference
inc_deficit$cum_per_diff <- with(inc_deficit, cum_diff/cum_pred_counter*100) ## cumulative % difference
```

```
M <- 1000 ## number of simulations
boot_cum_def <- NULL ## null vector to capture cumulative deficit %
```

```
# Simulation loop
for(i in 1:M) {
```

```
  boot_data <- simulate(model, nsim=1, seed=i) ## seed number is updated with simulation
  number
```

```
  boot_data1 <- boot_data[1:62,] ## data up to Feb 2020
  boot_data2 <- c(NA) ## data for Mar 2020
```



```

colnames(boot_data2) <- colnames(boot_data1)          ## data for Apr 2020+
boot_data3 <- boot_data[63:79,]

boot_outcome <- as.data.frame(c(boot_data1,boot_data2,boot_data3)) ## simulated data with proper NAs
colnames(boot_outcome) <- c("boot_outcome")
boot_dataset <- cbind(boot_outcome,inc)              ## dataset with simulated outcome and
original predictors

## analyze simulated outcome with same GLM model as final model and parameters
model_boot <- glmmTMB(boot_outcome ~ offset(log(stdpop)) + covid1*time + covid2*time,
                      data=boot_dataset, family=nbinom1)

## produce predictions
pred_sim <- predict(model_boot, type='response', newdata=boot_dataset)
pred_sim[63] <- NA ## set March 2020 predictions to NA

# counterfactual predictions
pred_counter_sim <- predict(model_boot, type='response', newdata=inc_counter)
pred_counter_sim[63] <- NA ## set March 2020 predictions to NA

## attach predictions and counterfactual to original data
boot_pred <- cbind(inc, pred_sim, pred_counter_sim)

# cumulative deficit
inc_deficit_sim <- subset(boot_pred, covid==1, select=c('year','month','pred_sim','pred_counter_sim'))

inc_deficit_sim$cum_pred <- cumsum(inc_deficit_sim$pred_sim) ## cumulative predicted
inc_deficit_sim$cum_pred_counter <- cumsum(inc_deficit_sim$pred_counter_sim) ## cumulative expected
inc_deficit_sim$cum_diff <- with(inc_deficit_sim, cum_pred - cum_pred_counter) ## cumulative difference
inc_deficit_sim$cum_per_diff <- with(inc_deficit_sim, cum_diff/cum_pred_counter*100) ## cumulative % difference

boot_cum_def <- c(boot_cum_def,inc_deficit_sim$cum_per_diff) ## save percentage
}

## modify saved output to create dataset
out <- matrix(boot_cum_def, nrow=17, ncol=M, byrow=F) ## 17 rows for the number of months in the pandemic
calculated, M columns for simulated output

## loop function to calculate percentile values across rows
out_q <- NULL

for(i in 1:17) { ## max number (17) is number of rows in "out" matrix
  outq <- quantile(out[i,], probs=c(0.025,0.975))
  out_q <- c(out_q,outq)
}

## transform out_q into dataframe
deficit_CI <- as.data.frame(matrix(out_q, nrow=17,ncol=2, byrow=T))
colnames(deficit_CI) <- c('cum_per_diff_lower','cum_per_diff_upper')

inc_deficit2 <- cbind(inc_deficit,deficit_CI)
inc_deficit2

```
